# Supplementary material for: Energetic dinitromethyl group functionalized azofurazan and its azofurazanates
Source: Royal Society of Chemistry journal article supplement (doi:10.1039/c6ra22007j), 2016-01-01
Supplement: c6ra22007j1.pdf [file c6ra22007j1.pdf]

## **Energetic Dinitromethyl Groups Functionalized Azofurazan and Its Azofurazanate**

Yongxing Tang,<sup>[a]</sup> Haixiang Gao,<sup>[b]</sup> Gregory H. Imler,<sup>[c]</sup> Damon A. Parrish<sup>[c]</sup> and

Jean'ne M. Shreeve\*<sup>[a]</sup>

[a] Dr. Y. Tang, Prof. Dr. J. M. Shreeve

Department of Chemistry, University of Idaho, Moscow, Idaho, 83844-2343, USA.

Fax: (+1) 208-885-9146

E-mail: [jshreeve@uidaho.edu](mailto:jshreeve@uidaho.edu)

[b] Prof. Dr. H. Gao

Department of Applied Chemistry, China Agricultural University, Beijing 100193,

China

[c] Dr. G. H. Imler, Dr. D. A. Parrish

Naval Research Laboratory, 4555 Overlook Avenue, Washington, D.C. 20375,

United States

***Table of Contents***

X-Ray crystallography data.....S3  
Isodesmic reactions.....S7

**X-Ray crystallography data****Table S1.** Crystal data and structure refinement for **2** and **3**.

| Identification code                                          | <b>2</b>                                                            | <b>3</b>                                                           |
|--------------------------------------------------------------|---------------------------------------------------------------------|--------------------------------------------------------------------|
| CCDC number                                                  | 1473226                                                             | 1473225                                                            |
| Empirical formula                                            | C <sub>6</sub> F <sub>2</sub> N <sub>10</sub> O <sub>10</sub>       | C <sub>6</sub> H <sub>2</sub> N <sub>10</sub> O <sub>10</sub>      |
| Formula weight                                               | 410.16                                                              | 374.18                                                             |
| Temperature/K                                                | 150(2) K                                                            | 150(2)                                                             |
| Crystal system                                               | Monoclinic                                                          | Monoclinic                                                         |
| Space group                                                  | P2 <sub>1</sub> /n                                                  | P2 <sub>1</sub> /n                                                 |
| <i>a</i> /Å                                                  | 7.2868(5)                                                           | 7.3983(9)                                                          |
| <i>b</i> /Å                                                  | 7.7602(5)                                                           | 7.6242(9)                                                          |
| <i>c</i> /Å                                                  | 12.5498(8)                                                          | 11.7823(14)                                                        |
| $\alpha$ /°                                                  | 90                                                                  | 90                                                                 |
| $\beta$ /°                                                   | 90.9520(10)                                                         | 94.006(2)                                                          |
| $\gamma$ /°                                                  | 90                                                                  | 90                                                                 |
| Volume/Å <sup>3</sup>                                        | 709.56(8)                                                           | 662.97(14)                                                         |
| <i>Z</i>                                                     | 2                                                                   | 2                                                                  |
| $\rho_{\text{calc}}/\text{cm}^3$                             | 1.920                                                               | 1.874                                                              |
| $\mu/\text{mm}^{-1}$                                         | 0.195                                                               | 0.178                                                              |
| F(000)                                                       | 408                                                                 | 376                                                                |
| Crystal size/mm <sup>3</sup>                                 | 0.460 × 0.375 × 0.210                                               | 0.320 × 0.302 × 0.060                                              |
| Radiation                                                    | MoK $\alpha$ ( $\lambda$ = 0.71073)                                 | MoK $\alpha$ ( $\lambda$ = 0.71073)                                |
| 2 $\Theta$ range for data collection/°                       | 3.086 to 29.934                                                     | 3.155 to 30.037                                                    |
| Index ranges                                                 | -10 ≤ <i>h</i> ≤ 10,<br>-10 ≤ <i>k</i> ≤ 10,<br>-16 ≤ <i>l</i> ≤ 17 | -9 ≤ <i>h</i> ≤ 10,<br>-10 ≤ <i>k</i> ≤ 10,<br>-15 ≤ <i>l</i> ≤ 16 |
| Reflections collected                                        | 7608                                                                | 6857                                                               |
| Independent reflections                                      | 2005 [ <i>R</i> <sub>int</sub> = 0.0146]                            | 1860 [ <i>R</i> <sub>int</sub> = 0.0386]                           |
| Data/restraints/parameters                                   | 2005 / 0 / 127                                                      | 1860 / 0 / 118                                                     |
| Goodness-of-fit on <i>F</i> <sup>2</sup>                     | 1.044                                                               | 1.043                                                              |
| Final <i>R</i> indexes [ <i>I</i> ≥ 2 $\sigma$ ( <i>I</i> )] | <i>R</i> <sub>1</sub> = 0.0298,<br><i>wR</i> <sub>2</sub> = 0.0768  | <i>R</i> <sub>1</sub> = 0.0418,<br><i>wR</i> <sub>2</sub> = 0.0811 |
| Final <i>R</i> indexes [all data]                            | <i>R</i> <sub>1</sub> = 0.0316,<br><i>wR</i> <sub>2</sub> = 0.0783  | <i>R</i> <sub>1</sub> = 0.0706,<br><i>wR</i> <sub>2</sub> = 0.0903 |
| Largest diff. peak/hole / e Å <sup>-3</sup>                  | 0.391 and -0.244                                                    | 0.397 and -0.218                                                   |

**Table S2.** Bond lengths [Å] and angles [°] for **2**.

|               |            |
|---------------|------------|
| O(1)-N(3)     | 1.2083(12) |
| O(2)-N(3)     | 1.2116(12) |
| N(3)-C(4)     | 1.5332(12) |
| C(4)-F(8)     | 1.3332(10) |
| C(4)-C(9)     | 1.4937(12) |
| C(4)-N(5)     | 1.5436(12) |
| N(5)-O(7)     | 1.2091(12) |
| N(5)-O(6)     | 1.2102(12) |
| C(9)-N(10)    | 1.3007(12) |
| C(9)-C(13)    | 1.4317(12) |
| N(10)-O(11)   | 1.3760(10) |
| O(11)-N(12)   | 1.3693(11) |
| N(12)-C(13)   | 1.3077(12) |
| C(13)-N(14)   | 1.4053(12) |
| N(14)-N(14)#1 | 1.2586(15) |

|                     |           |
|---------------------|-----------|
| O(1)-N(3)-O(2)      | 128.18(9) |
| O(1)-N(3)-C(4)      | 116.09(8) |
| O(2)-N(3)-C(4)      | 115.72(8) |
| F(8)-C(4)-C(9)      | 113.73(7) |
| F(8)-C(4)-N(3)      | 108.47(7) |
| C(9)-C(4)-N(3)      | 112.11(7) |
| F(8)-C(4)-N(5)      | 107.15(7) |
| C(9)-C(4)-N(5)      | 109.04(7) |
| N(3)-C(4)-N(5)      | 105.94(7) |
| O(7)-N(5)-O(6)      | 128.06(9) |
| O(7)-N(5)-C(4)      | 116.53(8) |
| O(6)-N(5)-C(4)      | 115.40(8) |
| N(10)-C(9)-C(13)    | 108.80(8) |
| N(10)-C(9)-C(4)     | 119.98(8) |
| C(13)-C(9)-C(4)     | 131.07(8) |
| C(9)-N(10)-O(11)    | 105.58(7) |
| N(12)-O(11)-N(10)   | 111.45(7) |
| C(13)-N(12)-O(11)   | 105.55(8) |
| N(12)-C(13)-N(14)   | 118.56(8) |
| N(12)-C(13)-C(9)    | 108.62(8) |
| N(14)-C(13)-C(9)    | 132.81(8) |
| N(14)#1-N(14)-C(13) | 111.34(9) |

---

Symmetry transformations used to generate equivalent atoms:

#1 -x,-y+1,-z+2

**Table S3.** Torsion angles [°] for **2**.

---

|                           |             |
|---------------------------|-------------|
| O(1)-N(3)-C(4)-F(8)       | -34.26(11)  |
| O(2)-N(3)-C(4)-F(8)       | 146.75(9)   |
| O(1)-N(3)-C(4)-C(9)       | -160.68(9)  |
| O(2)-N(3)-C(4)-C(9)       | 20.33(12)   |
| O(1)-N(3)-C(4)-N(5)       | 80.49(10)   |
| O(2)-N(3)-C(4)-N(5)       | -98.49(10)  |
| F(8)-C(4)-N(5)-O(7)       | 145.74(8)   |
| C(9)-C(4)-N(5)-O(7)       | -90.76(10)  |
| N(3)-C(4)-N(5)-O(7)       | 30.09(11)   |
| F(8)-C(4)-N(5)-O(6)       | -35.60(10)  |
| C(9)-C(4)-N(5)-O(6)       | 87.91(9)    |
| N(3)-C(4)-N(5)-O(6)       | -151.25(8)  |
| F(8)-C(4)-C(9)-N(10)      | 122.76(9)   |
| N(3)-C(4)-C(9)-N(10)      | -113.72(9)  |
| N(5)-C(4)-C(9)-N(10)      | 3.26(11)    |
| F(8)-C(4)-C(9)-C(13)      | -52.30(13)  |
| N(3)-C(4)-C(9)-C(13)      | 71.22(12)   |
| N(5)-C(4)-C(9)-C(13)      | -171.80(9)  |
| C(13)-C(9)-N(10)-O(11)    | 0.09(10)    |
| C(4)-C(9)-N(10)-O(11)     | -175.98(7)  |
| C(9)-N(10)-O(11)-N(12)    | 0.26(10)    |
| N(10)-O(11)-N(12)-C(13)   | -0.52(11)   |
| O(11)-N(12)-C(13)-N(14)   | 179.92(8)   |
| O(11)-N(12)-C(13)-C(9)    | 0.55(11)    |
| N(10)-C(9)-C(13)-N(12)    | -0.42(11)   |
| C(4)-C(9)-C(13)-N(12)     | 175.06(9)   |
| N(10)-C(9)-C(13)-N(14)    | -179.66(10) |
| C(4)-C(9)-C(13)-N(14)     | -4.18(17)   |
| N(12)-C(13)-N(14)-N(14)#1 | 174.46(10)  |
| C(9)-C(13)-N(14)-N(14)#1  | -6.36(16)   |

---

Symmetry transformations used to generate equivalent atoms:

#1 -x,-y+1,-z+2

**Table S4.** Bond lengths [Å] and angles [°] for **3**.

---

|           |            |
|-----------|------------|
| O(1)-N(3) | 1.2175(18) |
| O(2)-N(3) | 1.2142(17) |
| N(3)-C(4) | 1.5169(17) |
| C(4)-C(8) | 1.491(2)   |
| C(4)-N(5) | 1.515(2)   |
| C(4)-H(4) | 1.0000     |
| N(5)-O(6) | 1.2155(17) |
| N(5)-O(7) | 1.2197(17) |

|                     |            |
|---------------------|------------|
| O(8)-N(11)          | 1.3678(16) |
| O(8)-N(9)           | 1.3814(17) |
| C(8)-N(9)           | 1.2982(19) |
| C(8)-C(12)          | 1.4319(19) |
| N(11)-C(12)         | 1.302(2)   |
| C(12)-N(13)         | 1.4069(18) |
| N(13)-N(13)#1       | 1.262(2)   |
|                     |            |
| O(2)-N(3)-O(1)      | 126.83(13) |
| O(2)-N(3)-C(4)      | 115.45(12) |
| O(1)-N(3)-C(4)      | 117.66(12) |
| C(8)-C(4)-N(5)      | 111.31(11) |
| C(8)-C(4)-N(3)      | 108.08(11) |
| N(5)-C(4)-N(3)      | 107.13(11) |
| C(8)-C(4)-H(4)      | 110.1      |
| N(5)-C(4)-H(4)      | 110.1      |
| N(3)-C(4)-H(4)      | 110.1      |
| O(6)-N(5)-O(7)      | 127.05(14) |
| O(6)-N(5)-C(4)      | 115.55(12) |
| O(7)-N(5)-C(4)      | 117.40(13) |
| N(11)-O(8)-N(9)     | 111.32(11) |
| N(9)-C(8)-C(12)     | 108.32(13) |
| N(9)-C(8)-C(4)      | 121.61(12) |
| C(12)-C(8)-C(4)     | 130.05(13) |
| C(8)-N(9)-O(8)      | 105.73(11) |
| C(12)-N(11)-O(8)    | 105.33(12) |
| N(11)-C(12)-N(13)   | 119.42(13) |
| N(11)-C(12)-C(8)    | 109.29(13) |
| N(13)-C(12)-C(8)    | 131.29(14) |
| N(13)#1-N(13)-C(12) | 111.20(14) |

---

Symmetry transformations used to generate equivalent atoms:

#1 -x,-y+1,-z+2

**Table S5.** Torsion angles [°] for **3**.

---

|                     |            |
|---------------------|------------|
| O(2)-N(3)-C(4)-C(8) | -81.46(15) |
| O(1)-N(3)-C(4)-C(8) | 96.08(15)  |
| O(2)-N(3)-C(4)-N(5) | 158.50(13) |
| O(1)-N(3)-C(4)-N(5) | -23.96(17) |
| C(8)-C(4)-N(5)-O(6) | 163.63(12) |
| N(3)-C(4)-N(5)-O(6) | -78.42(15) |
| C(8)-C(4)-N(5)-O(7) | -16.13(17) |
| N(3)-C(4)-N(5)-O(7) | 101.82(14) |

|                           |             |
|---------------------------|-------------|
| N(5)-C(4)-C(8)-N(9)       | 113.15(14)  |
| N(3)-C(4)-C(8)-N(9)       | -4.23(18)   |
| N(5)-C(4)-C(8)-C(12)      | -68.66(18)  |
| N(3)-C(4)-C(8)-C(12)      | 173.96(13)  |
| C(12)-C(8)-N(9)-O(8)      | -0.52(15)   |
| C(4)-C(8)-N(9)-O(8)       | 178.02(12)  |
| N(11)-O(8)-N(9)-C(8)      | 0.12(15)    |
| N(9)-O(8)-N(11)-C(12)     | 0.36(15)    |
| O(8)-N(11)-C(12)-N(13)    | 178.96(11)  |
| O(8)-N(11)-C(12)-C(8)     | -0.67(15)   |
| N(9)-C(8)-C(12)-N(11)     | 0.79(16)    |
| C(4)-C(8)-C(12)-N(11)     | -177.59(14) |
| N(9)-C(8)-C(12)-N(13)     | -178.79(14) |
| C(4)-C(8)-C(12)-N(13)     | 2.8(3)      |
| N(11)-C(12)-N(13)-N(13)#1 | -176.88(15) |
| C(8)-C(12)-N(13)-N(13)#1  | 2.7(2)      |

Symmetry transformations used to generate equivalent atoms:

#1 -x,-y+1,-z+2

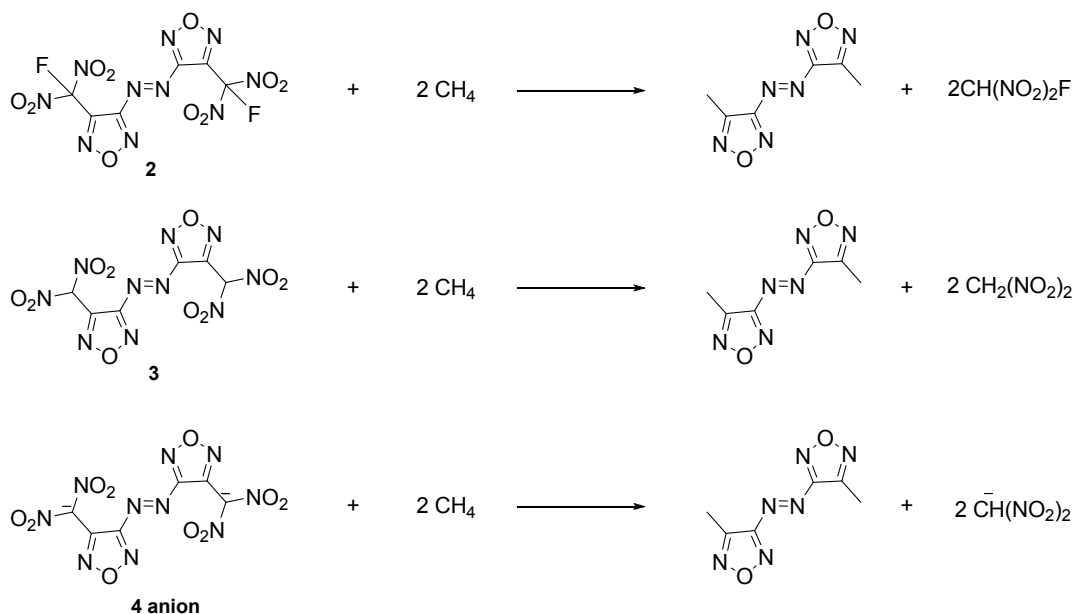

**Scheme S1.** Isodesmic reactions for **2**, **3** and **4 anion**
